# Supplementary material
Source: PubMed Central journal article supplement (PMC6699639)
Supplement: NIHMS1531114-supplement-Supplemental_Material.pdf [file NIHMS1531114-supplement-Supplemental_Material.pdf]

**Supplemental Table. Stroke Mimics with Documented Final Non-Stroke Diagnosis and Stroke Mimics with Final Non-Stroke Diagnosis Missing or Unknown**

| <b>Variable</b>                                     | <b>Stroke mimics with documented non-stroke diagnosis N=974</b> | <b>Stroke mimics with final non-stroke diagnosis missing or unknown N=1543</b> | <b>p-value</b> |
|-----------------------------------------------------|-----------------------------------------------------------------|--------------------------------------------------------------------------------|----------------|
| <b>Demographics</b>                                 |                                                                 |                                                                                |                |
| Age, median (IQR), y                                | 52 (43-63)                                                      | 55 (45-68)                                                                     | <0.001         |
| Female, No. (%)                                     | 652 (66.9)                                                      | 893 (57.9)                                                                     | <0.001         |
| Race/ethnicity                                      |                                                                 |                                                                                | 0.13           |
| Non-Hispanic white                                  | 571 (58.6)                                                      | 852 (55.2)                                                                     |                |
| Non-Hispanic black                                  | 235 (24.1)                                                      | 378 (24.5)                                                                     |                |
| Hispanic                                            | 93 (9.5)                                                        | 150 (9.7)                                                                      |                |
| Asian                                               | 18 (1.8)                                                        | 40 (2.6)                                                                       |                |
| Other                                               | 50 (5.1)                                                        | 113 (7.3)                                                                      |                |
| Insurance                                           |                                                                 |                                                                                | 0.04           |
| Private                                             | 446 (45.8)                                                      | 609 (39.5)                                                                     |                |
| Medicare                                            | 148 (15.2)                                                      | 284 (18.4)                                                                     |                |
| Medicaid                                            | 171 (17.6)                                                      | 271 (17.6)                                                                     |                |
| Self-pay                                            | 84 (8.6)                                                        | 121 (7.8)                                                                      |                |
| <b>Medical history</b>                              |                                                                 |                                                                                |                |
| Atrial fibrillation/flutter                         | 25 (2.6)                                                        | 61 (4.0)                                                                       | 0.05           |
| Prosthetic heart valve                              | 4 (0.4)                                                         | 5 (0.3)                                                                        | 0.75           |
| Previous stroke/transient ischemic attack           | 330 (33.9)                                                      | 457 (29.6)                                                                     | 0.05           |
| Carotid stenosis                                    | 9 (0.9)                                                         | 26 (1.7)                                                                       | 0.10           |
| Coronary artery disease/prior myocardial infarction | 104 (10.7)                                                      | 220 (14.3)                                                                     | 0.005          |
| Heart failure                                       | 32 (3.3)                                                        | 69 (4.5)                                                                       | 0.11           |
| Hypertension                                        | 515 (52.9)                                                      | 877 (56.8)                                                                     | 0.008          |
| Dyslipidemia                                        | 313 (32.1)                                                      | 507 (32.9)                                                                     | 0.46           |
| Peripheral vascular disease                         | 14 (1.4)                                                        | 28 (1.8)                                                                       | 0.43           |

|                                                                              |               |               |        |
|------------------------------------------------------------------------------|---------------|---------------|--------|
| Diabetes mellitus                                                            | 247 (25.4)    | 422 (27.3)    | 0.15   |
| Smoker                                                                       | 184 (18.9)    | 334 (21.6)    | 0.05   |
| <b>Clinical characteristics</b>                                              |               |               |        |
| Arrival by emergency medical services (EMS)                                  | 589 (60.5)    | 965 (62.5)    | 0.10   |
| Off-hour admission                                                           | 451 (46.3)    | 723 (46.9)    | 0.79   |
| Patient location when stroke symptoms discovered, healthcare facility        | 51 (5.2)      | 79 (5.1)      | 0.97   |
| Onset to arrival time, median (IQR), minutes                                 | 66 (41-109)   | 66 (42-106)   | 0.91   |
| Ambulatory status prior to current event, with assistance/unable to ambulate | 24 (2.4)      | 65 (4.2)      | 0.03   |
| Ambulatory status on admission, with assistance/unable to ambulate           | 275 (28.3)    | 456 (29.6)    | 0.44   |
| Initial exam findings                                                        |               |               |        |
| No neurological signs/symptoms                                               | 1 (0.1)       | 9 (0.6)       | 0.05   |
| Weakness/paralysis                                                           | 579 (59.4)    | 832 (53.9)    | 0.05   |
| Altered states of consciousness                                              | 146 (15.0)    | 237 (15.4)    | 0.44   |
| Aphasia                                                                      | 388 (39.8)    | 527 (34.2)    | 0.02   |
| Other neurological signs/symptoms                                            | 295 (30.3)    | 394 (25.5)    | 0.04   |
| NIHSS, median (IQR)                                                          | 7 (4-11)      | 6 (4-10)      | 0.01   |
| Systolic blood pressure, median (IQR), mmHg                                  | 146 (131-165) | 147 (131-169) | 0.53   |
| Heart rate, median (IQR), bpm                                                | 84 (74-96)    | 84 (73-95)    | 0.40   |
| Door-to-needle time, median (IQR), min                                       | 53 (41-72)    | 57 (44-80)    | <0.001 |
| Medications prior to admission                                               |               |               |        |
| Antiplatelets or anticoagulants                                              | 337 (34.6)    | 575 (37.3)    | 0.07   |
| Antihypertensive                                                             | 427 (43.8)    | 689 (44.7)    | 0.39   |
| Cholesterol reducer                                                          | 308 (31.6)    | 511 (33.1)    | 0.38   |
| Diabetic medication                                                          | 182 (18.7)    | 313 (20.3)    | 0.19   |
| <b>Hospital characteristics</b>                                              |               |               |        |

|                                                 |               |               |        |
|-------------------------------------------------|---------------|---------------|--------|
| Number of beds, median (IQR)                    | 506 (302-708) | 487 (320-682) | 0.89   |
| Annual ischemic stroke volume, median (IQR)     | 257 (205-412) | 258 (202-408) | 0.62   |
| Hospital type, academic                         | 801 (82.2)    | 1,308 (84.8)  | 0.12   |
| Primary stroke center                           | 640 (65.7)    | 1,061 (68.8)  | 0.11   |
| Annual IV tPA cases, median (IQR)               | 35 (24-53)    | 35 (25-47)    | 0.55   |
| <b>Rural</b>                                    |               |               |        |
| Geographic region                               |               |               | <0.001 |
| Northeast                                       | 180 (18.5)    | 332 (21.5)    |        |
| Midwest                                         | 114 (11.7)    | 250 (16.2)    |        |
| South                                           | 414 (42.5)    | 517 (33.5)    |        |
| West                                            | 266 (27.3)    | 444 (28.8)    |        |
| <b>Calendar year</b>                            |               |               | 0.13   |
| 2010                                            | 0 (0.0)       | 48 (3.1)      |        |
| 2011                                            | 19 (2.0)      | 45 (2.9)      |        |
| 2012                                            | 57 (5.9)      | 77 (5.0)      |        |
| 2013                                            | 82 (8.4)      | 113 (7.3)     |        |
| 2014                                            | 93 (9.5)      | 175 (11.3)    |        |
| 2015                                            | 150 (15.4)    | 223 (14.5)    |        |
| 2016                                            | 287 (29.5)    | 408 (26.4)    |        |
| 2017                                            | 286 (29.4)    | 454 (29.4)    |        |
| <b>Safety endpoints</b>                         |               |               |        |
| Symptomatic intracranial hemorrhage             | 2 (0.2)       | 9 (0.6)       | 0.14   |
| Life-threatening or serious systemic hemorrhage | 1 (0.1)       | 0 (0.0)       | 0.22   |
| Other serious complication                      | 6 (0.6)       | 20 (1.3)      | 0.08   |
| Any tPA complication                            | 9 (0.9)       | 29 (1.9)      | 0.04   |
| <b>In-hospital outcomes</b>                     |               |               |        |
| In-hospital mortality                           | 3 (0.3)       | 18 (1.2)      | 0.02   |
| Discharge to home                               | 852 (87.5)    | 1,257 (81.5)  | <0.001 |

---

|                                     |            |            |        |
|-------------------------------------|------------|------------|--------|
| Discharge to hospice                | 4 (0.4)    | 12 (0.8)   | 0.26   |
| Discharge to SNF                    | 60 (6.2)   | 129 (8.4)  | 0.0414 |
| Discharge to IRF                    | 47 (4.8)   | 110 (7.1)  | 0.0200 |
| Independent ambulation at discharge | 662 (83.6) | 880 (75.3) | <.0001 |

---
